## Direct introduction of cloned DNA into the sea urchin zygote nucleus, and fate of injected DNA

ROBERTA R. FRANKS, BARBARA R. HOUGH-EVANS, ROY J. BRITTEN  
and ERIC H. DAVIDSON

*Division of Biology, California Institute of Technology, Pasadena, CA 91125, USA*

### Summary

A method is described for microinjection of cloned DNA into the zygote nucleus of *Lytechinus variegatus*. Eggs of this species are unusually transparent, facilitating visual monitoring of the injection process. The initial fate of injected DNA fragments appears similar to that observed earlier for exogenous DNA injected into unfertilized egg cytoplasm. Thus after end-to-end ligation, it is replicated after a lag of several hours to an extent indicating that it probably participates in most of the later rounds of DNA synthesis undergone by the host cell genomes during cleavage. The different consequences of nuclear *versus* cytoplasmic injection are evident at advanced larval stages. Larvae descendant from eggs in which exogenous DNA was injected into the nuclei are four times more likely (32 % *versus* 8 %) to retain this DNA in cell lineages that replicate very extensively during larval growth, i.e. the lineages contributing to the imaginal rudiment, and thus to display greatly enhanced contents of the exogenous DNA. Similarly, 36 % of postmetamorphic juveniles from a nuclear injection sample retained the exogenous DNA sequences, compared to 12 % of

juveniles from a cytoplasmic injection sample. However, the number of copies of the exogenous DNA sequences retained per average genome in postmetamorphic juveniles was usually less than 0.1 (range 0.05–50), and genome blot hybridizations indicate that these sequences are organized as integrated, randomly oriented, end-to-end molecular concatenes. It follows that only a small fraction of the cells of the average juvenile usually retains the exogenous sequences. Thus, even when introduced by nuclear microinjection, the stable incorporation of exogenous DNA in the embryo occurs in a mosaic fashion, although in many recipients the DNA enters a wider range of cell lineages than is typical after cytoplasmic injection. Nuclear injection would probably be the route of choice for studies of exogenous DNA function in the postembryonic larval rudiment.

Key words: microinjection, zygote nucleus, mosaic incorporation, sea urchin, DNA, *Lytechinus variegatus*, *Cy11a*, cytoskeletal actin.

### Introduction

Since the introduction of a method for microinjection of cloned DNA fragments into sea urchin egg cytoplasm (McMahon *et al.* 1984, 1985; Flytzanis *et al.* 1985), many different exogenous genes have been shown to undergo appropriate developmental expression in embryos developing from the injected eggs. These include histone genes (Colin *et al.* 1987); the *Cy11a*, *Cy1*, and *M* actin genes of *Strongylocentrotus purpuratus* (Flytzanis *et al.* 1987; Katula *et al.* 1987; Hough-Evans *et al.* 1987; D. Livant & E. Davidson,

unpublished data); and the *Spe1* gene (W. Klein, personal communication), and the SM50 spicule matrix protein gene of this species (H. Sucov, B. Hough-Evans & E. Davidson, unpublished data). Cytoplasmic injection is easy, rapid, and obviously very useful for studies of gene regulation in the sea urchin embryo. However, a feature of this experimental approach, which for certain applications might constitute a significant drawback, is that incorporation into the embryo nuclei is usually mosaic (Flytzanis *et al.* 1985; Hough-Evans *et al.* 1987; unpublished DNA *in situ* hybridization data). The

fraction of nuclei that retain the exogenous DNA after injection into unfertilized egg cytoplasm varies from a few per late cleavage embryo to a large proportion, and in the very exceptional case, all. In any given batch of embryos, however, only a minor fraction of the total embryonic cells contain the exogenous genes. Thus, it may be difficult to detect the effects of such genes on the host embryo, e.g. in the case where competition for regulatory factors would be expected to affect transcription of the homologous endogenous gene (Flytzanis *et al.* 1987). A more serious consequence of mosaic DNA incorporation is that, unless the exogenous DNA happens to be stably included in those cell lineages that give rise to the imaginal rudiment from which the juvenile sea urchin derives, the injected genes cannot be used to study rudiment development, and they will be lost at metamorphosis when the lineage elements confined to the larval structures are discarded. Thus Flytzanis *et al.* (1985) found that in cytoplasmically injected *S. purpuratus* eggs about 55 % of the experimental embryos stably incorporated the DNA; but, of these, only 20 % apparently included it in the growing imaginal structures, as indicated by its continuing replication beyond  $\sim 500\times$  the initial mass injected; and only 5–15 % of juveniles emerging from metamorphosis in the samples studied retained exogenous DNA sequences.

In this paper, we compare the consequences of direct injection of exogenous DNA into the zygote nucleus to those of cytoplasmic injection, using the same cloned DNA construct and the same batches of *L. variegatus* eggs. We are here concerned with the fate of the injected DNA, rather than its expression, on which we have reported separately (Franks *et al.* 1988). While direct nuclear introduction does not convert stable embryonic incorporation of the DNA to a uniform rather than a mosaic process, the DNA is clearly more widely distributed amongst diverse embryonic cell lineages. Thus we show that nuclear introduction results in significant enhancement of the probability that the larval rudiment and the postmetamorphic juvenile sea urchin will include the exogenous DNA sequences.

## Materials and methods

### *Preparation and injection of Lytechinus variegatus* eggs

All operations were performed at room temperature. Gametes were obtained from *Lytechinus variegatus* (Marine Specimens Unlimited, Big Pine Key, FL) by intracoelomic injection of a 0.5 M-KCl solution. Eggs were prepared for microinjection as previously described (McMahon *et al.* 1985), except that the jelly coats were removed by exposure to Millipore filtered sea water (FSW) at a pH of  $\sim 4.8$  for

2–4 min. Microinjection was carried out as described by McMahon *et al.* (1985), but with the following modifications. Microinjection needles were pulled on a P-77-B Brown-Flaming micropipette puller and broken off to form a tip 0.4–0.9  $\mu\text{m}$  in diameter. For introduction of DNA into the zygote nucleus, the eggs were fertilized following fixation to protamine sulphate-coated microinjection dishes in FSW containing penicillin at  $20 \text{ i.u. l}^{-1}$  and streptomycin at  $50 \mu\text{g l}^{-1}$  (PSFSW) by addition of a few drops of dilute (1/100) sperm, and the PSFSW was replaced by fresh PSFSW to remove excess sperm prior to microinjection. Following pronuclear fusion (about 20 min postfertilization) approximately 2  $\mu\text{l}$  of a 40 % glycerol solution containing either 3000 or 7000 CylIIa-CAT DNA molecules (Flytzanis *et al.* 1985, 1987) were injected into each egg. The plasmid had been linearized by digestion at the unique *SphI* site. Because a continuously flowing microinjection needle was necessary for egg penetration (see McMahon *et al.* 1985), it was not possible to inject into the nucleus without introducing some DNA into the egg cytoplasm as well. The fraction of the total solution that was injected directly into the nucleus was not determined. An average of 50 zygote nuclei (out of a total of 80 fertilized eggs per dish) could be successfully injected in a 20 min interval. For cytoplasmic injections, 150 eggs per dish were injected over an interval of about 10 min. Following microinjection, the embryos were allowed to develop *in situ* as described by McMahon *et al.* (1985).

### *Culture of L. variegatus* larvae through metamorphosis

Larvae were cultured as previously described (Flytzanis *et al.* 1985) for *S. purpuratus* with some modifications (Hinegardner & Rocha Tuzzi, 1981; Leahy, 1986). At 48 h postfertilization, the plutei were transferred to either 125 ml flasks ( $\sim 20$  plutei/flask) or 250 ml flasks ( $\sim 40$  plutei/flask) containing FSW. The larvae were cultured at room temperature and fed about 3000 *Rhodomonas* sp. per litre daily beginning at 48 h. At 2–3 weeks, the mature larvae were transferred to glass Petri dishes (15  $\times$  2.2 cm), the surfaces of which were coated with a bacterial film prepared as described by Cameron & Hinegardner (1974). Metamorphosis occurred within 1 h and was taken to completion in  $\sim 5$  days. The juvenile sea urchins were then transferred to plastic dishes (15  $\times$  1.5 cm) that had a layer of surface-dwelling diatoms (*Nitzschia*) growing on the bottom. The sea urchins were fed on diatoms for  $\sim 2$  weeks, during which time they were transferred to fresh dishes every 2 days. They were subsequently placed in aquaria containing small alga-covered rocks on which they grazed, and  $\sim 1$  week later the 'sea lettuce' *Ulva* was introduced for feeding.

### *Determination of cell number during embryogenesis*

*L. variegatus* embryos were grown at 23°C and were collected at 1 h intervals. Cell numbers of 1–5 h embryos were counted directly from squashed preparations. Cell number in 4–12 h-old embryos was determined from the amount of DNA measured in a known number of pooled embryos, on the basis that each diploid cell contains 1.6 pg DNA (Pikó *et al.* 1967). Embryos were collected, spun down in a microfuge and resuspended in 50  $\mu\text{l}$  250 mM-

Tris-HCl, pH 7.8. An equal volume of 1% Triton X-100, 10  $\mu$ l 0.5 M-EDTA, pH 8.0, and 1  $\mu$ l 20 mg ml<sup>-1</sup> proteinase K were added and the samples incubated for 2 h at 55°C. DNA measurements were made fluorometrically using the DAPI (4,6-diamidino-2-phenylindole) method described by Brunk *et al.* (1979).

#### Measurement of CAT DNA content per embryo

The number of CyIIIa·CAT molecules per embryo was determined essentially as described earlier (Flytzanis *et al.* 1987). Pellets containing 25–50 injected embryos were lysed in 100  $\mu$ l of 250 mM-Tris-HCl, pH 7.8, by three consecutive freeze-thaw cycles. Half of each lysate was removed for DNA measurement, mixed with an equal volume of 0.1 M-EDTA, pH 8.0, 1% SDS, and incubated with 20  $\mu$ g of proteinase K for 2 h at 55°C. The nucleic acids were extracted once in phenol:chloroform:isoamylalcohol (25:24:1) and once in chloroform:isoamylalcohol (24:1). A sample was used to determine the total amount of DNA recovered by the DAPI method and the remaining solution was treated with 0.4 M-NaOH at 65°C for 1 h to denature the DNA and hydrolyse the RNA, and was filtered onto nitrocellulose using a Schleicher and Schuell Minifold II slot-blot apparatus. The slots were cut in half, and the halves were separately hybridized with single-stranded RNA probes prepared from Sp6 vectors and containing sequences representing either the CAT gene or the single-copy *S. purpuratus* Cyl actin gene sequence (Flytzanis *et al.* 1987; Lee *et al.* 1984). Probe specific activities were about 1.3  $\times 10^9$  cts min<sup>-1</sup>  $\mu$ g<sup>-1</sup>. The reaction of the Cyl probe with the measured mass of *S. purpuratus* carrier embryo DNA present in each half slot served as a hybridization efficiency standard. Hybridizations were carried out as described (Flytzanis *et al.* 1985, 1987), except that hybridizations with the CAT probe and Cyl actin probe were at 40°C and 35°C, respectively. The filters were washed twice with 2  $\times$  SSC (0.15 M-NaCl, 0.015 M-sodium citrate), 0.2% SDS at room temperature, twice with 2  $\times$  SSC, 0.2% SDS at 60°C, and twice with 1  $\times$  SSC, 0.2% SDS at 60°C. Following autoradiography, each half-slot was cut out and counted, and calculations were carried out exactly as described earlier (Flytzanis *et al.* 1987).

#### Measurement of CAT DNA content in 2- and 3-week *L. variegatus* larvae

Total DNA was extracted from individual larvae derived from injected eggs and was analysed in dot blot assays as previously described (Flytzanis *et al.* 1985) using <sup>32</sup>P-labelled pSVOCAT (Gorman *et al.* 1982), nick-translated to a specific activity of about 1.0–1.3  $\times 10^8$  cts min<sup>-1</sup>  $\mu$ g<sup>-1</sup>, as the hybridization probe. DNA standards containing 9.5  $\times 10^5$ , 1.9  $\times 10^5$ , 3.8  $\times 10^4$  and 7.6  $\times 10^3$  molecules of linearized CyIIIa·CAT were included on each filter. Autoradiography was performed with preflashed Kodak XAR-5 film using an intensifying screen at -70°C, and the approximate number of CyIIIa·CAT DNA molecules per larva was estimated by densitometry of the autoradiographs, with reference to the signals obtained with the known standards.

#### Measurement of CAT DNA content in postmetamorphosis *L. variegatus* juveniles

Total DNA was extracted from individual sea urchins as described by Flytzanis *et al.* (1985). The DNA was dissolved in 40  $\mu$ l 10 mM-Tris-HCl, pH 8.0, 1 mM-EDTA, and one-quarter of the sample was digested with *Bgl*III and, after electrophoresis in a 0.8% agarose gel, transferred to nitrocellulose (Southern, 1975) for hybridization with the nick-translated pSVOCAT probe. An aliquot of undigested DNA was included. Hybridizations and washes were carried out using the high criterion conditions of Lee *et al.* (1984). The number of CyIIIa·CAT DNA molecules per sample was estimated by densitometry with reference to standards, as above. The quantity of juvenile DNA present in the blots was obtained as follows. Subsequent to autoradiography, the hybridized counts were removed from the filters with two 15–20 min washes of 500 ml 0.1  $\times$  SSC, 0.1% SDS, at 95°C. The filters were then rehybridized with the insert derived from pCyl (3') (Lee *et al.* 1984), which represents a single-copy Cyl actin gene sequence from the genome of *S. purpuratus*, nick-translated to a specific activity of about 1.0–1.3  $\times 10^8$  cts min<sup>-1</sup>  $\mu$ g<sup>-1</sup>. Under the low criterion hybridization conditions of Lee *et al.* (1984), this probe reacts clearly with a single-copy sequence of the *L. variegatus* genome. This reaction was used to estimate by densitometry the amount of total DNA transferred onto the nitrocellulose, by comparison to the hybridization reaction obtained with standard amounts of *L. variegatus* genomic DNA present on the same filters. The number of cells represented in each lane was then calculated on the basis that each diploid cell contains 1.6 pg DNA (Pikó *et al.* 1967). Thus, the number of CAT DNA molecules per sample could be converted to average number of CAT molecules per cell.

## Results

#### Microinjection of DNA into nuclei of fertilized eggs of *Lytechinus variegatus*

A method for microinjecting DNA into the cytoplasm of unfertilized eggs of the sea urchin *Strongylocentrotus purpuratus* was previously developed in this laboratory, as described by McMahon *et al.* (1985). The opaque eggs of this species are not suitable for nuclear injection, however, and for this purpose we have turned to the almost transparent eggs of the Gulf Coast sea urchin *Lytechinus variegatus*, in which the zygote nuclei are clearly visible. The eggs are attached to plastic dishes by electrostatic attraction and prepared for microinjection with the minor modifications of our earlier procedure noted in Materials and methods. Initial attempts to microinject the unfertilized egg pronucleus failed because this organelle offers no resistance to the tip of the needle, which as it is advanced pushes the pronucleus away and across the egg. However, following fertilization and pronuclear fusion, a cytoskeletal architecture rapidly assembles (reviewed by Schatten, 1982) and

the zygote nucleus becomes more stably anchored in its central position. As shown in Fig. 1, the zygote nucleus can now be penetrated by the microneedle, though it is important to stress that, since it is necessary to use a continuously flowing needle to gain penetration, DNA solution is distributed to the cytoplasm as well. With some practice, nuclear injection can be accomplished deftly, so that the dwell time of the needle within the egg approaches that required for cytoplasmic injection. The number of eggs that can be injected in the nucleus in a given amount of time falls within a modest factor of the number that can be injected in the cytoplasm in the same interval (see Materials and methods). An average of about 60–65 % of *L. variegatus* embryos in nuclear injection samples and 75–80 % of those in the

cytoplasmic injection samples complete normal embryogenesis to the feeding pluteus stage, 48 h postfertilization. As described earlier for *S. purpuratus* (McMahon *et al.* 1985), there is some variability between batches of eggs in their response to microinjection and an occasional batch of injected eggs will arrest at a very early stage of development.

#### *Embryonic amplification of the exogenous DNA after nuclear or cytoplasmic injection*

The cloned DNA utilized for the present studies was the *S. purpuratus* CyIIIa·CAT construct described by Davidson *et al.* (1985) and Flytzanis *et al.* (1987). As indicated in the map reproduced in Fig. 2, this fusion construct includes several kilobases of upstream actin gene sequence, now known to contain regulatory elements that are necessary and sufficient to mediate

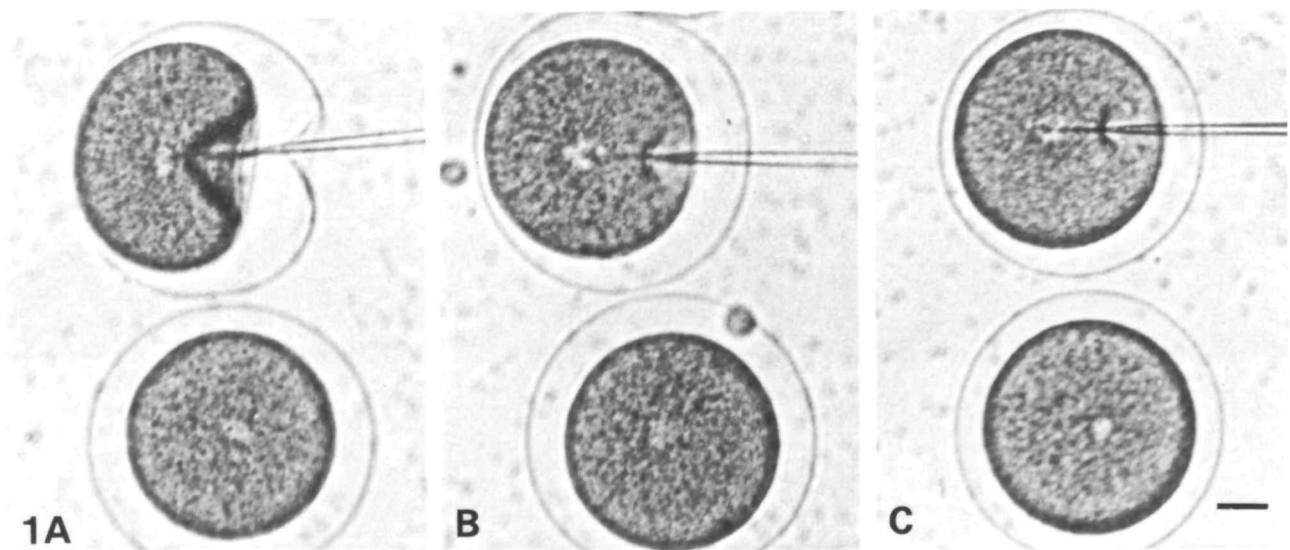

**Fig. 1.** Microinjection of *L. variegatus* zygote nuclei. Unfertilized eggs (120  $\mu$ m diameter) were fixed to a tissue culture dish and fertilized as described in Materials and methods. Microinjections into zygote nuclei were performed following pronuclear fusion, about 15–20 min postfertilization, utilizing a continuously flowing needle. In A the injection needle can be seen just prior to penetration of the cell membrane. While the fertilization membrane is easily penetrated, the egg cell membrane, coated with hyalin, is often deeply indented before being pierced by the needle. In B and C both cytoplasmic and nuclear membranes have been penetrated by the needle tip, and DNA solution is in the process of being deposited in the nucleus.

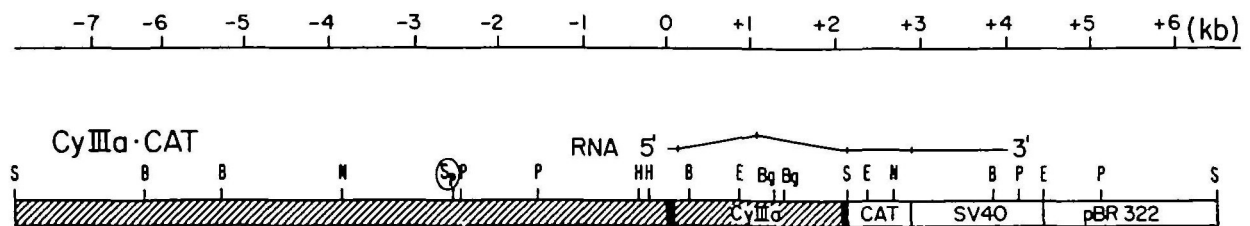

**Fig. 2.** Diagram of the CyIIIa·CAT fusion gene. Hatched areas represent sea urchin sequences, including a 2.2 kb intron contained within the CyIIIa primary transcript (Akhurst *et al.* 1987). The fusion point is a *SalI* site located 11 codons following the start codon of the CyIIIa·CAT message (see Davidson *et al.* 1985; Flytzanis *et al.* 1987 for details of CyIIIa·CAT construction). The CyIIIa·CAT construct also contains an SV40 poly(A) addition site and pBR322 plasmid sequences. The *SphI* site (circled) was used for linearization of the fusion gene for microinjection. Restriction sites shown are B, *Bam*HI; Bg, *Bgl*II; E, *Eco*RI; H, *Hind*III; N, *Nco*I; P, *Pst*I; S, *Sal*I; Sp, *Sph*I.

its correct spatial and temporal expression (Flytzanis *et al.* 1987; Hough-Evans *et al.* 1987). The CyIIIa regulatory region is ligated to a 'reporter' gene coding for bacterial chloramphenicol acetyl transferase (CAT). An SV40 poly(A) addition site and plasmid sequences are also included, and the total length of the construct is about 14 kb.

The CyIIIa·CAT plasmid was linearized at a unique *Sph*I site about 2.5 kb upstream of the transcription initiation site (Akhurst *et al.* 1987), and an average of 7000 molecules was introduced into the nucleus (plus cytoplasm) or exclusively into the cytoplasm of fertilized eggs. The embryos were then pooled at various developmental stages and their DNA was coextracted with a known number of uninjected *S. purpuratus* embryos. Slot-blot filter hybridization assays were carried out with a labelled RNA probe for the CAT gene sequence. A second probe consisting of a single-copy *Cyl* actin gene sequence present in the *S. purpuratus* genome (Lee *et al.* 1984) was used as a hybridization efficiency standard, as described in Materials and methods. A sample of a slot-blot hybridization set is reproduced in Fig. 3A. The radioactivity of the hybridized DNA was measured by scintillation counting of the filters and, after the efficiency correction, the average number of CyIIIa·CAT DNA molecules per injected embryo was estimated from the specific activity of the labelled CAT probe.

Quantities of CAT DNA per embryo are shown in Fig. 3B for two different matched nuclear and cytoplasmic injection series, each carried out with eggs from a single female. The exogenous DNA content was clearly amplified during cleavage of the host embryos, though to a different extent in the two batches of eggs utilized. Only small and possibly nonsignificant differences distinguish the curves representing CAT DNA content of embryos derived from eggs injected in the nucleus from those of the respective cytoplasmic injection controls. This result implies a high efficiency for the process by which DNA introduced into the cytoplasm is ultimately incorporated into the nuclei, presumably by assembly into nucleoid bodies which ultimately fuse with the blastomere nuclei (Forbes *et al.* 1983). That is, little additional replication is observed on direct introduction of the DNA into the nucleus, the only cellular compartment in which bulk DNA replication may occur.

The kinetics of exogenous DNA amplification shown in Fig. 3B are consistent with a mosaic incorporation mechanism for both nuclear and cytoplasmic injection samples. Our current evidence with respect to cytoplasmically injected *S. purpuratus* eggs suggests that stable incorporation of exogenous DNA typically occurs in one (or more) blastomere nuclei

between 2nd and 5th cleavage, with a peak frequency at 4th cleavage (B. R. Hough-Evans & E. H. Davidson, unpublished data). Fig. 3B shows that by 9 h postfertilization (at 23°C) most of the cells in normal *L. variegatus* embryos have undergone nine cleavages (i.e. except for the small micromeres, which arrest after 6th cleavage, and the cells of the skeletogenic mesenchyme, which enter a prolonged pause after 8th cleavage; see Davidson, 1986 for review). In contrast to the cellular DNA, the exogenous DNA of experiment 1 of Fig. 3B has replicated only five times by the 10 h time point and, in experiment 2, only three to four times. It should be noted, in reference to this comparison, that cleavage of injected eggs begins about 30 min–1 h later than that of controls, apparently due to injection trauma. In experiment 1, a lag of several cleavage cycles appears to ensue before the content of exogenous DNA in the majority of the injected embryos begins to amplify. It can be seen that thereafter, in this experiment, the relative rate of exogenous DNA increase is close to that of the cellular DNA. For the latter, between 2nd and 9th cleavage, the cellular DNA doubling time is about 0.9 h and, between 5 and 10 h, it is about the same for both the nuclear and cytoplasmic injection samples of experiment 1. The batch of eggs utilized for experiment 2 was evidently more heterogeneous as well as less active in exogenous DNA amplification. The average embryo of experiment 1, whether belonging to the nuclear or the cytoplasmic injection sample, could thus have incorporated the exogenous DNA into a state where it could undergo cyclic replication in a single 3rd–4th cleavage blastomere in each embryo and subsequently replicated this DNA on about the same schedule as the endogenous nuclear DNA. Of course, on this evidence, it cannot be excluded that incorporation is actually more widespread early in development, but that there also occurs continuous loss of exogenous DNA sequence during cleavage. Fig. 3B indeed indicates a small, gradual decrease in exogenous DNA content after the blastula stage but, as shown below for these embryos and by McMahon *et al.* (1985) and Flytzanis *et al.* (1985) for *S. purpuratus* embryos, much of the exogenous DNA is permanently retained and continues to replicate for weeks during the growth of the feeding larva.

We may ask the nature of the limiting step that is responsible for the initial kinetics characterizing the onset of quantitative replication of the exogenous DNA. Since these kinetics appear the same in the cytoplasmic and nuclear injection samples, they are probably determined by an intranuclear process, possibly association of the exogenous DNA concatenate(s) with one or more of the blastomere chromosomes. We know from the clonal recovery study of

Flytzanis *et al.* (1985) that the exogenous DNA is ultimately integrated into the genome, and this could occur within several cycles after incorporation (or insertion by microinjection) into the nuclear compartment, although there is yet no direct evidence for embryonic stages. In both the experiments shown in Fig. 3B, the average replication in the nuclear sample by the end of cleavage (10 h) in fact slightly exceeds that of the cytoplasmic injection sample, although this could merely result from experimental scatter. The following data show that, if it is real, this relatively modest difference ( $\sim 30\%$ ) could be correlated with a higher probability of inclusion of the exogenous DNA in a wider range of cell lineages than in the cytoplasmic injection controls.

*Amplification of exogenous DNA in larvae derived from eggs injected in nucleus or cytoplasm*

Flytzanis *et al.* (1985) showed that following injection of linear DNA into the cytoplasm of unfertilized eggs of *S. purpuratus* the exogenous sequences persist stably in an average of 55% of mature larvae raised from the injected eggs. In subsequent studies higher fractions have often been observed. Measurements of the amounts of exogenous DNA present in these

larvae indicated that, in about half of the individuals that retained these sequences, little or no further amplification occurred after embryogenesis, while in the remainder many additional rounds of exogenous DNA replication took place as the larvae developed. This phenomenon is almost certainly due to the mosaic confinement of the exogenous DNA to cell lineages that display relatively little postembryonic replication, e.g. the aboral ectoderm, in those larvae displaying no further amplification of exogenous DNA (Flytzanis *et al.* 1985). The larvae continuing to replicate their DNA would include, by the same argument, the exogenous DNA in lineages that are significantly augmented during postembryonic growth, i.e. mainly those descended from the embryonic vegetal plate, and also the small micromeres (Pehrson & Cohen, 1986) and at least portions of the oral ectoderm (see Davidson, 1986 for review).

Fig. 4 shows that in *L. variegatus* direct introduction of exogenous DNA into the zygote nucleus in an appreciable number of recipients results in a large augmentation of the extent of its replication during larval growth. DNA was extracted from a set of 64 individual larvae, 2–3 weeks after feeding began, that descended from eggs injected in the nuclei, and from

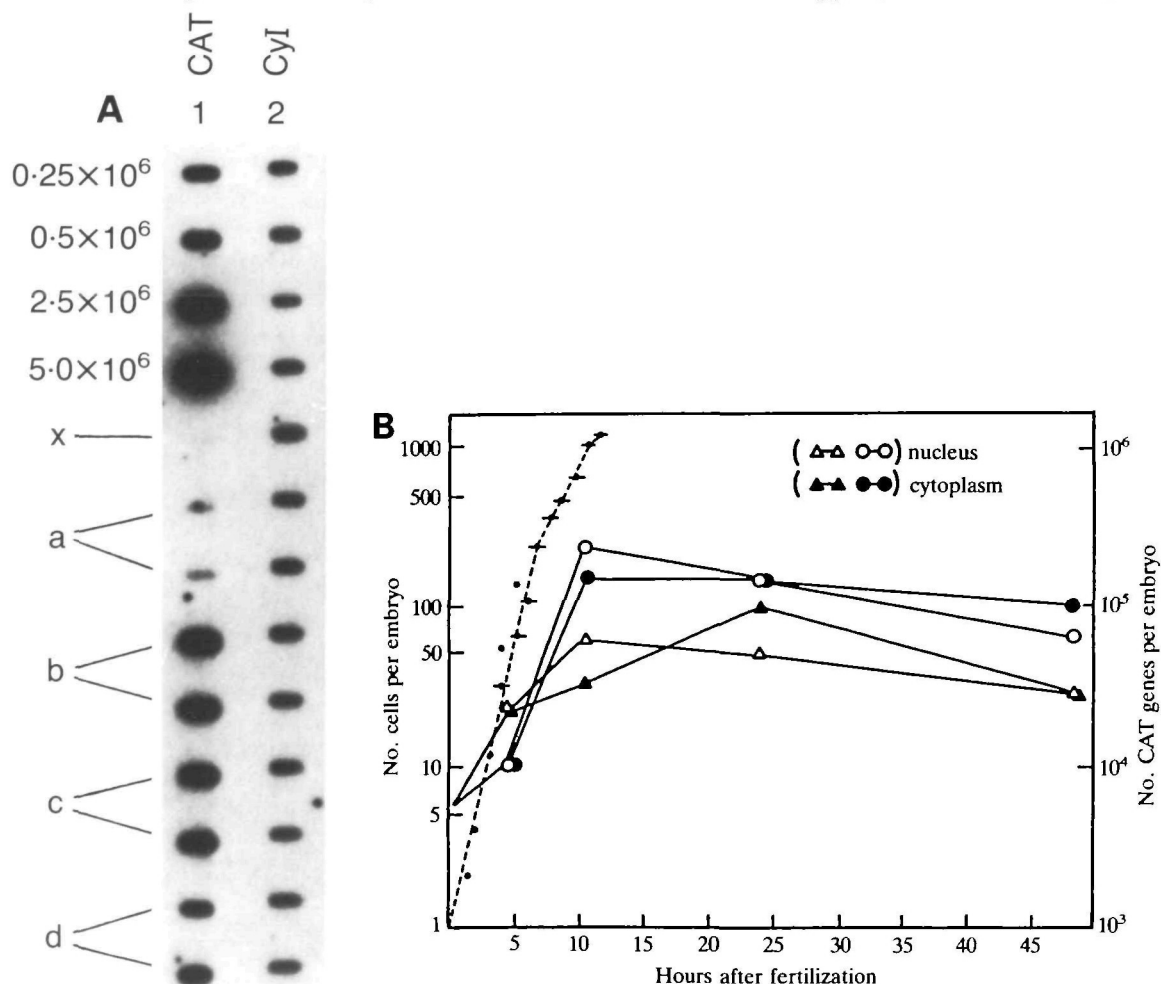

an equal number of larvae derived from cytoplasmically injected eggs. The individual DNA samples were then hybridized with a probe containing a portion of the CAT gene sequence, as illustrated in Fig. 4A. Dot-blot hybridizations such as these were utilized for estimations of the quantities of exogenous DNA in each larva (see legend). The large majority of positive larvae in both the nuclear and cytoplasmic groups contain amounts of CAT DNA greater than were generated on average during embryonic DNA replication. Thus, only 7/26 larvae in the cytoplasmic

**Fig. 3.** Amplification of CyIIIa·CAT DNA in nuclear- and cytoplasmic-injected embryos. Fertilized eggs of *L. variegatus* were microinjected with about 7000 molecules of linearized CyIIIa·CAT plasmid DNA and allowed to develop at 23°C. (A) Slot-blot assays of exogenous DNA amplification. Embryos were pooled at various times and their DNA was coextracted with a known number of *S. purpuratus* embryos and loaded onto a nitrocellulose filter. The top slot of each pair (a–d) contains the DNA of 25 embryos that had been injected in the zygote nucleus; the bottom slot of each pair contains the DNA of 25 cytoplasmically injected embryos. One half of each slot was hybridized with a <sup>32</sup>P-labelled RNA probe representing the CyIIIa·CAT gene (column 1): slot a, 4–5 h; slot b, 10–11 h; slot c, 22–24 h; slot d, 48 h. Slot x (column 1) represents the level of nonspecific binding of the CAT probe to the DNA extracted from uninjected embryos. The first four slots of column 1 contain standard quantities of linearized CyIIIa·CAT DNA. The second half of each slot was hybridized with a radioactive RNA probe whose sequence represents the single-copy Cyl gene (Lee *et al.* 1984) of *S. purpuratus* (column 2). Each half slot in column 2 contains an amount of DNA equivalent to about  $0.5 \times 10^6$  Cyl actin DNA molecules. The region of the filter containing each half slot was excised and counted in a liquid scintillation counter. The number of CyIIIa·CAT DNA molecules present in each sample was calculated from the specific activity of the CAT probe and the hybridization efficiency, derived from the reaction of the Cyl actin probe (see Materials and methods). (B) Average CAT DNA content per embryo after fertilization of injected eggs. The results for both nuclear and cytoplasmic injection samples obtained with the slot blot presented in A is shown (experiment 1, ○, ●), together with the results of another experiment, carried out on a separate batch of eggs (experiment 2, △, ▲). Also shown in B is cell number as a function of time after fertilization for cleavage-stage embryos of *L. variegatus* (—). Cell number was determined either by counting individual cells in squashes on slides (1 h intervals from 1–5 h) (·), or by reference to the DNA content measured in pooled embryos (1 h intervals from 4–12 h) on the basis that each diploid cell contains 1.6 pg DNA (Pikó *et al.* 1967) (—). Cell numbers were determined on uninjected control embryos. The cleavage of injected embryos frequently lags by one cycle compared to controls, in consequence of an initial delay prior to the first cleavage.

sample and 6/34 in the nuclear sample displayed CAT DNA contents in the range 10–60 times the amount originally injected (compare with Fig. 3). Comparison with our previous *S. purpuratus* results (Flytzanis *et al.* 1985) suggests that *L. variegatus* embryos may amplify injected DNA slightly less during embryogenesis than do *S. purpuratus* embryos, in which 30- to >100-fold amplification is commonly observed after cytoplasmic injection (McMahon *et al.* 1985; Flytzanis *et al.* 1985, 1987), but that in *Lytechinus* the DNA is apparently more likely to be incorporated in cells that divide during larval growth. This could reflect a difference in cell fate during larval morphogenesis, a subject that is not well explored for any echinoid species. In any case, Fig. 4B shows that in the cytoplasmic group 17/26 positive larvae (65%) amplified the exogenous DNA 60- to 600-fold, and only 2 (8%) showed greater amplification. In contrast, in the nuclear injection sample 17/34 (50%) fall within the 60- to 600-fold amplification class, but 11/34 or 32% contain more than 700 times the amount of CAT DNA initially introduced into these eggs. Our interpretation is that when introduced directly into the zygote nucleus the exogenous DNA has a significantly greater probability of being included in a vegetal plate lineage or one of the eight small micromere lineages (Pehrson & Cohen, 1986), which are the predominant sources of the cells from which the imaginal rudiment of the larva is constructed. The rudiment is the major site of extensive cell division during larval morphogenesis. This difference is difficult to detect in the embryo, since most lineages display roughly the same extent of cell replication during embryogenesis, but it becomes obvious after feeding begins, when some lineages reproduce several fold more than do others.

#### *CyIIIa·CAT DNA in postmetamorphic juveniles*

The results shown in Fig. 4B imply that a larger fraction of postmetamorphic juveniles raised from eggs in which the exogenous DNA was introduced into the nucleus should retain these sequences than in cytoplasmically injected samples. This follows from the argument that most cell division in the larva occurs in the rudiment from which the juvenile develops. DNA was extracted individually from 58 juveniles of several nuclear injection groups about two months postmetamorphosis, and from 59 juveniles of the corresponding cytoplasmic injection groups (survival and metamorphic success were about the same in the two samples). A sample of each individual DNA was utilized for genome blot hybridization with a labelled CAT DNA probe. These results, together with the frequency of retention of CAT DNA by 2- to 3-week-old larvae (from Fig. 4B), are summarized in Table 1. The fraction of juvenile



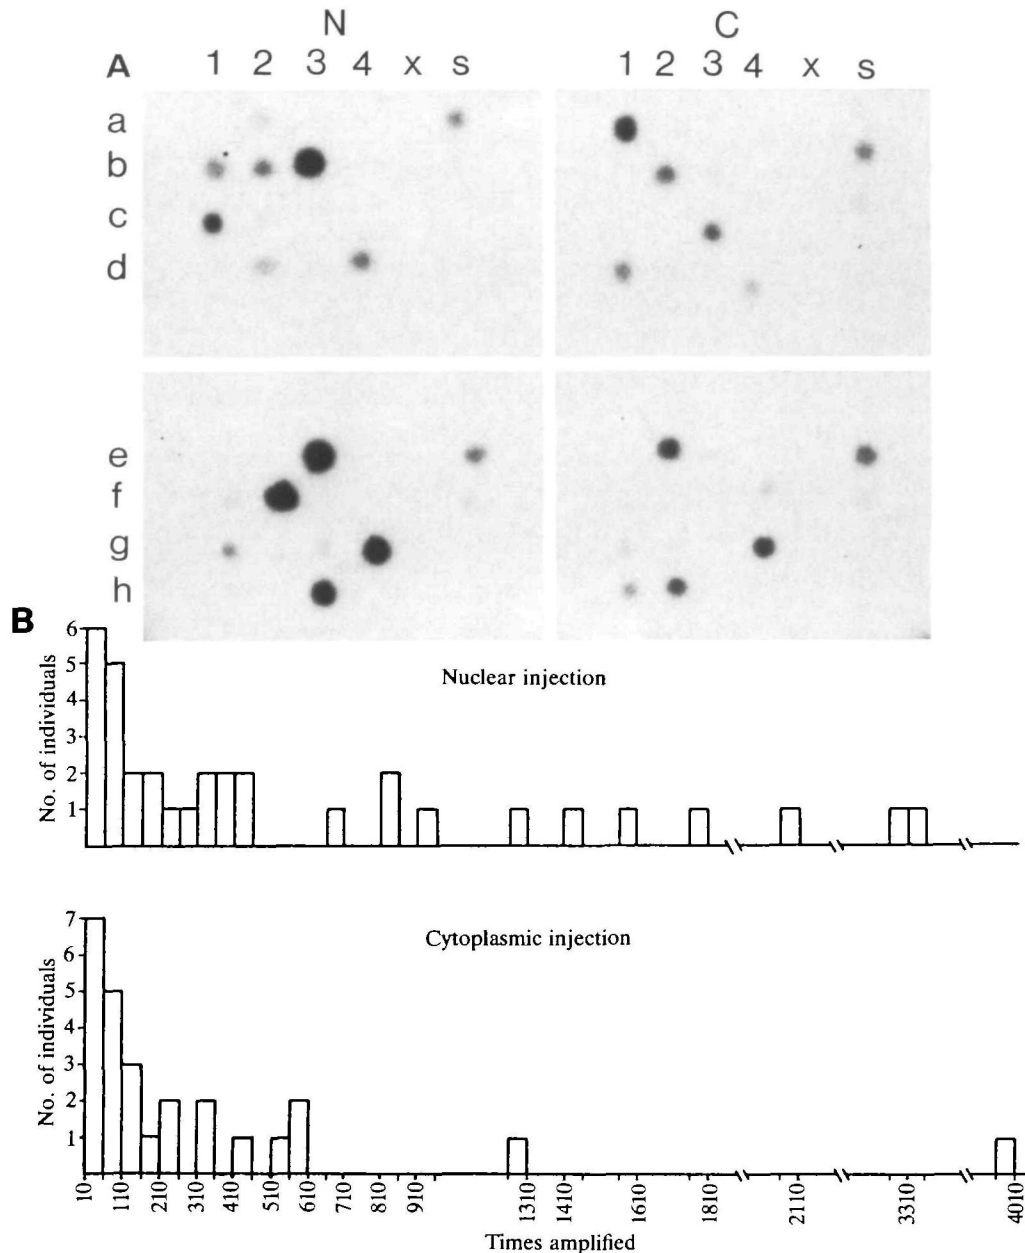

**Fig. 4.** Exogenous DNA sequences detected by dot-blot hybridization in genomic DNA of advanced feeding larvae. About 3000 molecules of CyIIIa·CAT DNA were microinjected into either the nucleus (N) or cytoplasm (C) of fertilized eggs. (A) Dot-blot hybridizations. Columns 1–4 contained DNA extracted from individual 2- to 3-week larvae raised from the injected eggs. Each position represents an assay carried out on a single larva. DNA extracted from uninjected larvae is in position xd and columns labelled s contain standard quantities of linearized CyIIIa·CAT plasmid DNA spotted onto the nitrocellulose filters: sa and se,  $9.5 \times 10^5$  molecules; sb and sf,  $1.9 \times 10^5$  molecules; sc and sg,  $3.8 \times 10^4$  molecules. Two experiments carried out with separate batches of eggs are reproduced: a–d and e–h. The filters were hybridized with  $^{32}\text{P}$ -pSVOCAT probe and autoradiographed. The limit of sensitivity in these experiments was about  $4 \times 10^4$  CyIIIa·CAT DNA molecules per larva, which would require an approximately 13-fold amplification of the DNA initially microinjected into the egg. (B) Graphic presentation of exogenous DNA contents in larvae derived from fertilized eggs injected in nucleus or cytoplasm. Estimates were obtained from experiments such as shown in A, by densitometry, with reference to standard amounts of linearized CyIIIa·CAT DNA spotted onto the same filters. Autoradiographic exposure times were adjusted so that the signals obtained for the experimental samples fell within the range of those for the standards and the values obtained were corrected for the relative lengths of exposure. The values shown can be considered minimal due to possible DNA loss during the extractions. The 34 positive larvae included in the nuclear injection histogram represented 53 % of the total individuals assayed and the 26 positive larvae included in the cytoplasmic injection sample were 41 % of the total assayed. Exogenous DNA was not detectable in the remainder (i.e.  $<13\times$  amplification; see A). Results shown are pooled from experiments with two different batches of eggs, which did not differ significantly in their individual distributions.



**Table 1.** Exogenous CAT DNA sequences retained in advanced larvae and juveniles

|                                       | Nucleus              |              |    | Cytoplasm            |              |    |
|---------------------------------------|----------------------|--------------|----|----------------------|--------------|----|
|                                       | No. animals analysed | No. positive | %  | No. animals analysed | No. positive | %  |
| 2- to 3-week larvae*                  | 64                   | 34           | 53 | 63                   | 26           | 41 |
| 2-month juveniles†                    | 58                   | 21           | 36 | 59                   | 7            | 12 |
| positive juveniles<br>positive larvae |                      |              | 68 |                      |              | 29 |

\* Data from the experiment of Fig. 4.

† The DNA was extracted from individual juveniles derived from injected eggs and the exogenous sequences were detected by genome blot hybridization, using nick-translated pSVOCAT (Gorman *et al.* 1982) as the probe. The amount of total DNA loaded per lane varied (e.g. see Table 2), but in each case was about one-quarter the DNA extracted from each animal. See Table 2 (legend) for estimation of the limit of sensitivity, below which the genome blot assay would fail to reveal exogenous sequences.

animals displaying CAT DNA in the nuclear injection sample was 36%, i.e. three times the retention frequency in the cytoplasmic injection sample. The juvenile cytoplasmic injection data of Table 1 are consistent with those reported earlier for *S. purpuratus*. Thus Flytzanis *et al.* (1985) concluded that 5–15% of postmetamorphic juveniles retain exogenous DNA introduced originally into the cytoplasm of (unfertilized) eggs. Nor in any subsequent trials utilizing cytoplasmic injection have we ever observed a juvenile retention frequency that approaches the 36% recovery from the nuclear injection sample shown in Table 1. Furthermore, Table 1 indicates that over two thirds of larvae in the nuclear injection group retaining the exogenous DNA would have given rise to juveniles that also retain it. The one third of the larvae in this class that would not have contained exogenous DNA as juveniles must again be considered the consequence of a mosaic exogenous DNA distribution. That is, there are larval lineages, such as the oral ectoderm and ciliary bands, that undergo some replication after feeding begins but that are not included in the rudiment from which the juvenile derives. The degree of mosaicism is clearly higher in the cytoplasmic injection samples, since less than half as many of these positive larvae would give rise on average to positive juveniles (i.e. 29% versus 68%; Table 1). The results shown in Table 1 support directly the conclusion that nuclear introduction of exogenous DNA results in its stable inclusion in a greater variety of cell lineages, on the average, than does cytoplasmic introduction.

An example of a juvenile genome blot from an animal of the nuclear injection sample is shown in Fig. 5A. The undigested DNA sample (lane U) displays a high-molecular-weight band much longer than the 14 kb CyIIIa·CAT molecules originally injected. Hybridization of the CAT probe with *Bgl*III-digested DNA (lane D1) reveals two distinct bands of

about 20 and 14 kb. As shown in Fig. 5B, these are the reactive fragments expected from *Bgl*III digestion of a concatenate formed by random end-to-end ligation of CyIIIa·CAT DNA linearized at the *Sph*I site. A third fragment of 8 kb would also be generated upon digestion with *Bgl*III, but since this fragment consists entirely of sea urchin CyIIIa actin sequences it could not react with the CAT DNA probe. Fig. 5 demonstrates that the exogenous DNA concatenate carried in the genome of this particular juvenile is similar in structure to those earlier identified in embryos (McMahon *et al.* 1985) and juveniles (Flytzanis *et al.* 1985) developing from cytoplasmically injected *S. purpuratus* eggs. At the resolution of Fig. 5A, most of the CyIIIa·CAT sequences have evidently suffered no major reorganizations or deletions. Some minor bands that could represent junction sequences with the genomic DNA can also be observed in the overexposed autoradiograph displayed in lane D2 (see also Flytzanis *et al.* 1985). There is an average of at least 54 copies of the CyIIIa·CAT sequence per cell in this juvenile (i.e. if the concatenate were present in every cell). However, as shown in Table 2, this is a very unusual case. Here measurements of average exogenous DNA content per cell are presented for 11 additional positive juveniles recovered from two zygote nuclear injection series. Of these positive juveniles (out of 18 examined), only the one utilized for the experiment of Fig. 5 contained significantly more than one copy of CAT DNA per cell, on average. Genome blots for most of the remaining positive animals of Table 2 all displayed the same two bands on *Bgl*III digestion as shown in Fig. 5A, indicating that in each case CyIIIa·CAT concatenates were present. We do not know the number (*n*) of monomers in these low concentration concatenates, and the fractions of cells actually containing CyIIIa·CAT sequences would be

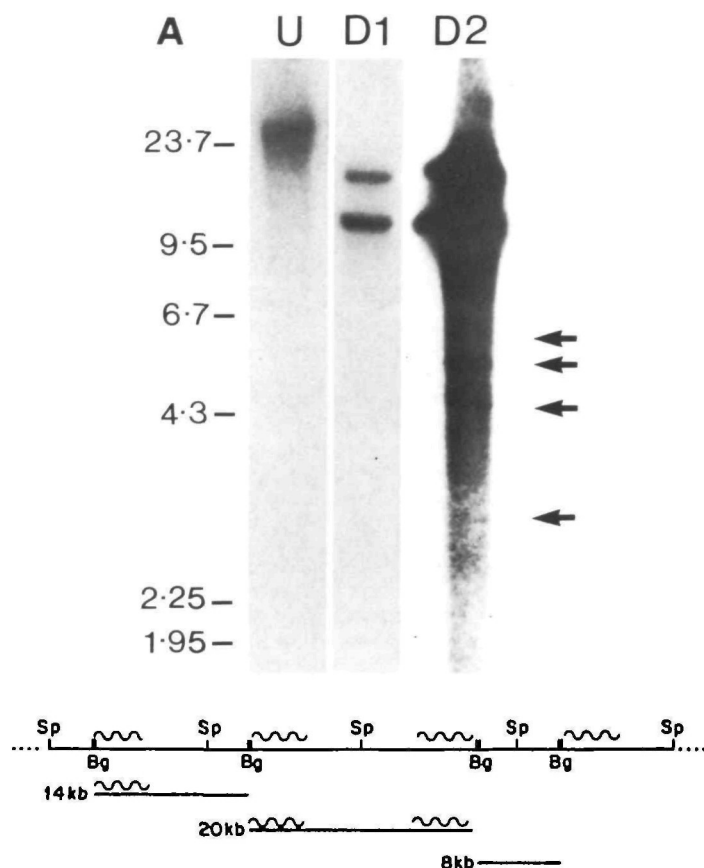

**Fig. 5.** Concatenated CyIIIa·CAT DNA in a juvenile sea urchin derived from a zygote injected in the nucleus. (A) Genome blot of DNA extracted from a 2-month-old juvenile. About 3000 molecules of CyIIIa·CAT were introduced into the nucleus and the individual was reared through metamorphosis. A sample of the DNA was digested with *Bgl*/II and, after electrophoresis, transferred to a nitrocellulose filter (lane D1). Hybridization was performed as described in Materials and methods. The probe was nick-translated pSVOCAT. Arrows indicate the positions in the overexposed autoradiograph (lane D2) of bands that could represent junction sequences between the CAT DNA and genomic DNA. The autoradiograph in lane U shows the hybridization reaction obtained with undigested DNA. (B) Diagram of CyIIIa·CAT concatenate that would be formed by random end-to-end ligation of CyIIIa·CAT molecules. The sizes (kb) of the fragments generated by *Bgl*/II digestion are shown. The wavy line indicates the region of homology between the CyIIIa·CAT sequence and the hybridization probe, pSVOCAT, used for the genome blots.

given by  $1/n \times$  the (CAT DNA/cell) values shown in Table 2. Thus the proportion of juvenile cells containing the exogenous DNA may in many cases be very small indeed, ranging from  $10^{-1}$  to  $10^{-4}$  if the concatenes consist of ten monomers, for example. The measurements of Table 2, in sum, provide further direct evidence of the highly mosaic character

of exogenous DNA incorporation in the nuclear injection juveniles.

It is very unlikely from the results in Table 2 that zygote nuclear injection could provide a route by which the frequency of incorporation of exogenous DNA into the germ line might be greatly enhanced. Germ line transmission does occur occasionally in animals raised from cytoplasmically injected *S. purpuratus* eggs (Flytzanis *et al.* 1986). Not surprisingly, examination of *L. variegatus* sperm DNA from eight male sea urchins raised from a zygote nuclear injection series and of the DNA of embryos produced by 15 females from this series yielded no cases in which germ line transmission could be demonstrated.

## Discussion

### *Stable DNA incorporation following injection of the zygote nucleus or cytoplasm*

The measurements presented demonstrate that the nuclear injection procedure does indeed deliver exogenous DNA into the nucleus, as the visual appearance of the injection process would indicate (Fig. 1). Thus, although some of the DNA solution is undoubtedly deposited in the cytoplasm, the results of nuclear injection are easily distinguished from those of cytoplasmic injection. In this study, we utilized eggs of a different species than has previously been employed for DNA transfer, and it is useful to summarize phenomenologically the results from both nuclear and cytoplasmic zygotic injection, as follows. (i) After injection by either route there may occur a lag of several cleavage cycles, and the exogenous DNA then commences to replicate at a rate little different from that of the cellular genomes, so that by termination of cleavage it is present in 10–40 times the mass initially introduced (Fig. 3). Replication in nuclear samples may slightly exceed that in cytoplasmic samples and, in both, a large proportion of the replicated exogenous sequence remains stably incorporated throughout the remainder of embryogenesis. (ii) The majority of individuals in both samples continue to replicate the exogenous DNA during larval growth, but we found that 32 % of advanced larvae derived from nuclear injection zygotes displayed exogenous DNA contents ranging from 700 times to 4000 times the initial inoculum, while all but 8 % of the cytoplasmic injection controls displayed less than 600 times the initial inoculum. (iii) Of postmetamorphic juveniles consisting of  $2-8 \times 10^6$  cells that were derived from a nuclear injection series, 36 % retained the exogenous DNA sequences *versus* 12 % for the cytoplasmic injection controls (Table 1). (iv) Genome blot hybridizations show that the juveniles retain the injected sequences in a concatenated

**Table 2.** Amounts of *CyIIIa*·CAT DNA in juveniles derived from zygote nuclear injection

| Individual juvenile | Amount ( $\mu$ g) of total DNA per sample* | No. cells represented† | Estimated no. CAT DNA molecules‡ | CAT DNA molecules§<br>no. cells represented |
|---------------------|--------------------------------------------|------------------------|----------------------------------|---------------------------------------------|
| 1                   | 1.3                                        | $8.1 \times 10^5$      | $4.4 \times 10^7$                | $5.4 \times 10^1$                           |
| 2                   | 2.2                                        | $1.4 \times 10^6$      | $1.7 \times 10^6$                | 1.2                                         |
| 3                   | 2.9                                        | $1.8 \times 10^6$      | $8.2 \times 10^5$                | $5.0 \times 10^{-1}$                        |
| 4                   | 2.0                                        | $1.2 \times 10^6$      | $2.5 \times 10^5$                | $2.0 \times 10^{-1}$                        |
| 5                   | 2.1                                        | $1.3 \times 10^6$      | $1.8 \times 10^5$                | $1.4 \times 10^{-1}$                        |
| 6                   | 2.7                                        | $1.7 \times 10^6$      | $1.2 \times 10^5$                | $1.7 \times 10^{-2}$                        |
| 7                   | 2.6                                        | $1.6 \times 10^6$      | $8.4 \times 10^4$                | $5.1 \times 10^{-2}$                        |
| 8                   | 0.8                                        | $5.1 \times 10^5$      | $1.9 \times 10^4$                | $3.8 \times 10^{-2}$                        |
| 9                   | 2.0                                        | $1.2 \times 10^6$      | $1.1 \times 10^4$                | $8.8 \times 10^{-3}$                        |
| 10                  | 3.5                                        | $2.2 \times 10^6$      | $1.2 \times 10^4$                | $5.5 \times 10^{-3}$                        |
| 11                  | 0.7                                        | $4.4 \times 10^5$      | $<1 \times 10^4$                 | ND¶                                         |
| 12                  | 1.5                                        | $9.4 \times 10^5$      | $<1 \times 10^4$                 | ND                                          |

\* One quarter of total DNA extracted from each juvenile was utilized per genome blot. The amount of total DNA in each sample was estimated as follows. After hybridization with the CAT probe, each blot was washed clean of bound probe (see Materials and methods) and rehybridized with a nick-translated insert derived from pCyI (3'), which includes a single-copy *CyI* actin gene sequence from the genome of *S. purpuratus* (Lee *et al.* 1984). This sequence cross-hybridizes with *L. variegatus* genomic DNA. The amount of DNA per sample was calculated by densitometry using as standards the hybridization signals obtained with known amounts of *L. variegatus* DNA present on the same blot.

† Based on a value of 1.6 pg of DNA per cell (Pikó *et al.* 1967)

‡ The number of CAT DNA sequences per sample was estimated by densitometry with reference to the hybridization signals obtained with nick-translated pSVOCAT, and standard amounts of linearized *CyIIIa*·CAT DNA placed on the same filter. The limit of sensitivity in these experiments was about  $1 \times 10^4$  plasmid molecules, with hybridization signals below this value too weak to measure by densitometry.

§  $\frac{\text{Estimated no. of CAT DNA molecules (column 4)}}{\text{No. of cells represented (column 3)}}$

For samples containing less DNA the minimum value for this ratio that could have been detected would of course be proportionately higher.

¶ ND, Could not be determined, due to amounts of CAT DNA too low for reliable densitometric estimation. Out of a similar-sized cytoplasmic injection sample (i.e. 18 individuals) examined at the same time only two were positive, and both contained quantities of CAT DNA below the limits of these measurements.

form (Fig. 5), but in most animals they are present in only small fractions of cells, perhaps in clones of the order of only  $10^2$  cells in some cases, much more in others (Table 2). The previous demonstrations of Flytzanis *et al.* (1985) in *S. purpuratus* show that the exogenous DNA is integrated into the genome in postlarval juveniles, and this may possibly occur as early as the onset of replication in cleavage.

#### *Interpretation: a mosaic pattern of exogenous DNA incorporation following nuclear injection*

As argued in detail above, all the results reported can be explained by the proposition that the predominant result of direct introduction of exogenous DNA into the zygote nucleus is the stable association of the DNA with the replicating chromosomes of a subset of embryonic cell nuclei several cleavage cycles later. The replication kinetics suggest that this is likely to have occurred in both nuclear and cytoplasmic samples during cleavage, and no doubt earlier in some embryos of each sample, and later in others. A large fraction of the progeny of the eight vegetal half blastomeres in the 4th cleavage embryo will contribute significantly to the imaginal rudiment of the larva,

while only a very small fraction of the ectodermal structures derived from the animal half gives rise to rudiment components (reviewed by Hyman, 1955; Cameron & Hinegardner, 1974; Davidson, 1986; Cameron *et al.* 1987). To all intents and purposes, the rudiment precursors amount to about half the blastomeres of the 3rd or 4th cleavage embryo. Later this fraction declines, due to the mitotic quiescence throughout embryogenesis of the eight small micromeres (Pehrson & Cohen, 1986). In larvae displaying very extensive exogenous DNA replication, these sequences must be included in the rudiment, which ultimately contains the large majority of the larval cells. Thus, if, for example, in two thirds of the positive individuals in a zygote nuclear injection sample incorporation occurred randomly in a single 3rd or 4th cleavage blastomere, one half of these embryos, i.e. one third of the total, just as observed (Fig. 4B; Table 1), would produce larvae in which the rudiments contained the injected sequences and from which would derive juveniles carrying these sequences. In the remainder, incorporation might occur later than 4th cleavage, decreasing in these embryos

the frequency with which the exogenous DNA will be included in the rudiment. However, there is another factor particular to the case of cytoplasmic injection that is worth considering as well. This is that the eight small micromeres, which may contribute significantly to the rudiment (Pehrson & Cohen, 1986), might often be excluded from the distribution of injected DNA, which is normally placed toward the middle of the egg. In any case, Hough-Evans and Davidson (unpublished data) have found in cytoplasmically injected *S. purpuratus* eggs the distribution of the fractions of cells containing the exogenous DNA centres symmetrically around 5–9%, suggesting a maximum frequency of stable incorporation of exogenous DNA at 4th cleavage. These data also suggest that in some embryos the DNA must be incorporated as early as 3rd cleavage and, in others, as late as 6th cleavage. Since about half the cells of the 3rd–4th cleavage embryo contribute some progeny to the rudiment structures of the larva, a significant bias against inclusion in the polar small micromeres seems the most likely explanation for the low frequency ( $\sim 1/12$ th) of larvae descendant from *cytoplasmically* injected eggs that contain the exogenous DNA in the rudiment. That is, if *no* small micromeres were to receive this DNA, the expected fraction of larvae whose rudiments contain exogenous DNA would be  $1/8$  for embryos in which incorporation occurred at 3rd cleavage, and  $1/16$  or less for those in which incorporation occurred later. Since in this model stable exogenous DNA incorporation occurs at about the same stage, i.e. 4th cleavage, on average, irrespective of the route of DNA introduction, little detectable difference would be expected in the overall exogenous DNA contents of the nuclear *versus* cytoplasmic injection samples at the end of cleavage, just as observed, particularly since the eight small micromeres cease division at 6th cleavage. On the other hand, it provides an interpretation of the large statistical distinction we report for the larval and postmetamorphic juvenile stages, i.e. the three- and fourfold increases, respectively, in the fractions retaining exogenous DNA after nuclear injection.

Mosaic incorporation in the nuclear injection sample is directly shown by the genome blot measurements of Table 2, and by the results of Table 1 as well. Thus the emergence of the juvenile from the larva is in fact itself a process of cell lineage segregation, in that most products of the oral and the aboral ectoderm lineages are left behind. Table 1 shows that in 71% of the positive larvae in the cytoplasmic injection sample the exogenous DNA is confined to such specifically larval lineages, *versus* only 32% in the nuclear injection sample. While direct proof of the mosaic incorporation scenario here invoked would

require for the nuclear injection sample a developmental series of DNA *in situ* hybridizations, there seems no plausible alternative, particularly since mosaic incorporation has already been demonstrated by this (unpublished data) and other methods (Flytzanis *et al.* 1985, 1987) to occur following cytoplasmic injection. One variant is that in nuclear injection samples the DNA could be initially incorporated in all or most nuclei and then lost from a majority during embryonic development. While some decrease in exogenous DNA content does occur (Fig. 3), possibly due to recombinational deletions from the tandem concatenates in which the DNA is initially organized (McMahon *et al.* 1985), the observed loss occurs equally in both nuclear and cytoplasmic samples. In addition, this mechanism would imply a much greater initial replication in the nuclear injection sample, which is not observed.

#### *Potential advantages of zygotic nuclear DNA injection*

There are at least two important experimental opportunities suggested by these observations. Expression studies on genes that function in only a few cells, or late in development, or in the rudiment itself, will be greatly facilitated by use of a system that increases the probability of inclusion of the exogenous gene in the cell type of interest. This is probably the most important and immediate practical advantage of the nuclear introduction system we describe. A second, more long-range, possibility is to exploit the mosaic incorporation feature by using it to study cell lineage in the morphogenesis of the imaginal rudiment itself, a problem of great fascination which at present is almost inaccessible. Unlike the embryo, the sea urchin larval rudiment develops from mesenchymal and other cells that cannot directly utilize the pre-formed three-dimensional spatial coordinates which the embryo inherits from the egg. The process by which rudiment progenitor cells sort out and establish their own spatial coordinates may in many ways resemble that by which pattern formation is initiated from totipotent cells in the postimplantation mammalian embryo. Injection of a suitable reporter gene into the zygote nucleus, the products of which can be detected cytologically (e.g. de Wet *et al.* 1987), could provide a series of clonal rudiment lineage markers that could be used to identify the origins and fates of small sets of cells as differentiation and multicellular organization take place in the rudiment. The advantage of such a marker is, of course, that it would not be abolished by dilution in consequence of extensive cell multiplication as are the 'passive' lineage markers now in use.

It is our pleasure to acknowledge Dr R. Andrew Cameron for cell number determinations in squashed preparations of early embryos, Mr Patrick Leahy for

culturing sea urchin embryos, larvae and juveniles and Mr Jeffrey Tekanic for his help with genome blot assays. This research was supported by NIH grant HD-05753. R.R.F. was supported by an NIH Postdoctoral Training Grant HD-07257.

## References

- AKHURST, R. J., CALZONE, F. J., LEE, J. J., BRITTEN, R. J. & DAVIDSON, E. H. (1987). Structure and organization of the CyIII actin gene subfamily of the sea urchin, *Strongylocentrotus purpuratus*. *J. molec. Biol.* **194**, 193–203.
- BRUNK, C. F., JONES, K. C. & JAMES, T. W. (1979). Assay for nanogram quantities of DNA in cellular homogenates. *Analyt. Biochem.* **92**, 497–500.
- CAMERON, R. A. & HINEGARDNER, R. T. (1974). Initiation of metamorphosis in laboratory-cultured sea urchins. *Biol. Bull. mar. biol. Lab., Woods Hole* **146**, 335–342.
- CAMERON, R. A., HOUGH-EVANS, B. R., BRITTEN, R. J. & DAVIDSON, E. H. (1987). Lineage and fate of each blastomere of the eight-cell sea urchin embryo. *Genes & Dev.* **1**, 75–84.
- COLIN, A. M., CATLIN, T. L., KIDSON, S. H. & MAXSON, R. (1987). Closely linked early and late H2b histone genes are differentially expressed after microinjection into sea urchin zygotes. *Proc. natn. Acad. Sci. U.S.A.* (in press).
- DAVIDSON, E. H. (1986). *Gene Activity in Early Development*, 3rd edn. Orlando: Academic Press.
- DAVIDSON, E. H., FLYTZANIS, C. N., LEE, J. J., ROBINSON, J. J., ROSE, S. J., III & SUCOV, H. M. (1985). Lineage-specific gene expression in the sea urchin embryo. *Cold Spring Harbor Symp. quant. Biol.* **50**, 321–328.
- DE WET, J. R., WOOD, K. V., DELUCA, M., HELSINKI, D. R. & SUBRAMANI, S. (1987). Firefly luciferase gene: Structure and expression in mammalian cells. *Mol. cell. Biol.* **7**, 725–737.
- FLYTZANIS, C. N., BRITTEN, R. J. & DAVIDSON, E. H. (1987). Ontogenic activation of a fusion gene introduced into the sea urchin egg. *Proc. natn. Acad. Sci. U.S.A.* **84**, 151–155.
- FLYTZANIS, C. N., MCMAHON, A. P., HOUGH-EVANS, B. R., KATULA, K. S., BRITTEN, R. J. & DAVIDSON, E. H. (1985). Persistence and integration of cloned DNA in postembryonic sea urchins. *Devl Biol.* **108**, 431–442.
- FORBES, D. J., KIRSCHNER, M. W. & NEWPORT, J. W. (1983). Spontaneous formation of nucleus-like structures around bacteriophage DNA microinjected into *Xenopus* eggs. *Cell* **34**, 13–23.
- FRANKS, R. R., HOUGH-EVANS, B. R., BRITTEN, R. J. & DAVIDSON, E. H. (1988). Spatially deranged but temporally correct expression of a sea urchin actin gene in transgenic embryos of a different genus. *Genes & Dev.* (in press).
- GORMAN, C. M., MOFFAT, L. F. & HOWARD, B. H. (1982). Recombinant genomes which express chloramphenicol acetyltransferase in mammalian cells. *Mol. cell. Biol.* **2**, 1044–1051.
- HINEGARDNER, R. T. & ROCHA TUZZI, M. M. (1981). Laboratory culture of the sea urchin *Lytechinus pictus*. In *Marine Invertebrates*, pp. 291–302. Washington, DC: National Academy Press.
- HOUGH-EVANS, B. R., FRANKS, R. R., CAMERON, R. A., BRITTEN, R. J. & DAVIDSON, E. H. (1987). Correct cell type-specific expression of a fusion gene injected into sea urchin eggs. *Devl Biol.* **121**, 576–579.
- HYMAN, L. H. (1955). *The Invertebrates: Echinodermata. The Coelomate Bilateria*, vol. IV. New York: McGraw-Hill.
- KATULA, K. S., HOUGH-EVANS, B. R., BRITTEN, R. J. & DAVIDSON, E. H. (1987). Ontogenic expression of a CyI actin fusion gene injected into sea urchin eggs. *Development* **101**, 437–447.
- LEAHY, P. S. (1986). Laboratory culture of *Strongylocentrotus purpuratus* adults, embryos, and larvae. *Meth. Cell Biol.* **27**, 1–13.
- LEE, J. J., SHOTT, R. J., ROSE, S. J. III, THOMAS, T. L., BRITTEN, R. J. & DAVIDSON, E. H. (1984). Sea urchin actin gene subtypes: Gene number, linkage, and evolution. *J. molec. Biol.* **172**, 149–176.
- MCMAHON, A. P., FLYTZANIS, C. N., HOUGH-EVANS, B. R., KATULA, K. S., BRITTEN, R. J. & DAVIDSON, E. H. (1985). Introduction of cloned DNA into sea urchin cytoplasm: Replication and persistence during embryogenesis. *Devl Biol.* **108**, 420–430.
- MCMAHON, A. P., NOVAK, T. J., BRITTEN, R. J. & DAVIDSON, E. H. (1984). Inducible expression of a cloned heat shock fusion gene in sea urchin embryos. *Proc. natn. Acad. Sci. U.S.A.* **81**, 7490–7494.
- PEHRSON, J. R. & COHEN, L. H. (1986). The fate of the small micromeres in sea urchin development. *Devl Biol.* **113**, 522–526.
- PIKÓ, L., TYLER, A. & VINOGRAD, J. (1967). Amount, location, priming capacity, circularity and other properties of cytoplasmic DNA in sea urchin eggs. *Biol. Bull. mar. biol. Lab., Woods Hole* **132**, 68–90.
- SCHATTEN, G. (1982). Motility during fertilization. *Int. Rev. Cytol.* **79**, 59–164.
- SOUTHERN, E. M. (1975). Detection of specific sequences among DNA fragments separated by gel electrophoresis. *J. molec. Biol.* **98**, 503–517.

(Accepted 4 November 1987)
